# Supplementary material for: Identification of novel exosomal miRNAs and their role in diagnosis and prognosis of Triple Negative Breast Cancer
Source: bioRxiv preprint, doi:10.1101/2025.06.13.659272, version 1 (2025-06-18)
Supplement: Supplementary file 1 [file 659272_file02.docx]

**Supplementary Section**

**Identification of novel exosomal miRNAs and their prognostic significance in Triple Negative Breast Cancer**

Ananya Choudhary¹, Priyanka Jain¹, Satish S. Poojary¹, Harit Chaturvedi², Bhudev C. Das¹*

1. Amity Institute of Molecular Medicine and Stem Cell Research, Amity University Uttar Pradesh, India
2. Max Institute of Cancer Care, Max Super Speciality hospital, Saket, New Delhi, India,

*Correspondence should be addressed to Bhudev Das, [bcdas@amity.edu](mailto:bcdas@amity.edu)

**Corresponding Author**

Prof. Bhudev C. Das,

Amity Institute of Molecular Medicine & Stem Cell Research (AIMMSCR),

Amity University, Sector-125, Noida, 201313,

Uttar Pradesh, India.

Tel: +91-120-2586855, +91-9810566870

Fax: +91-120-4392114

E-Mail:- bcdas@amity.edu

**Supplementary Figures : Workflows and Experimental Strategies**

**Figure 1**


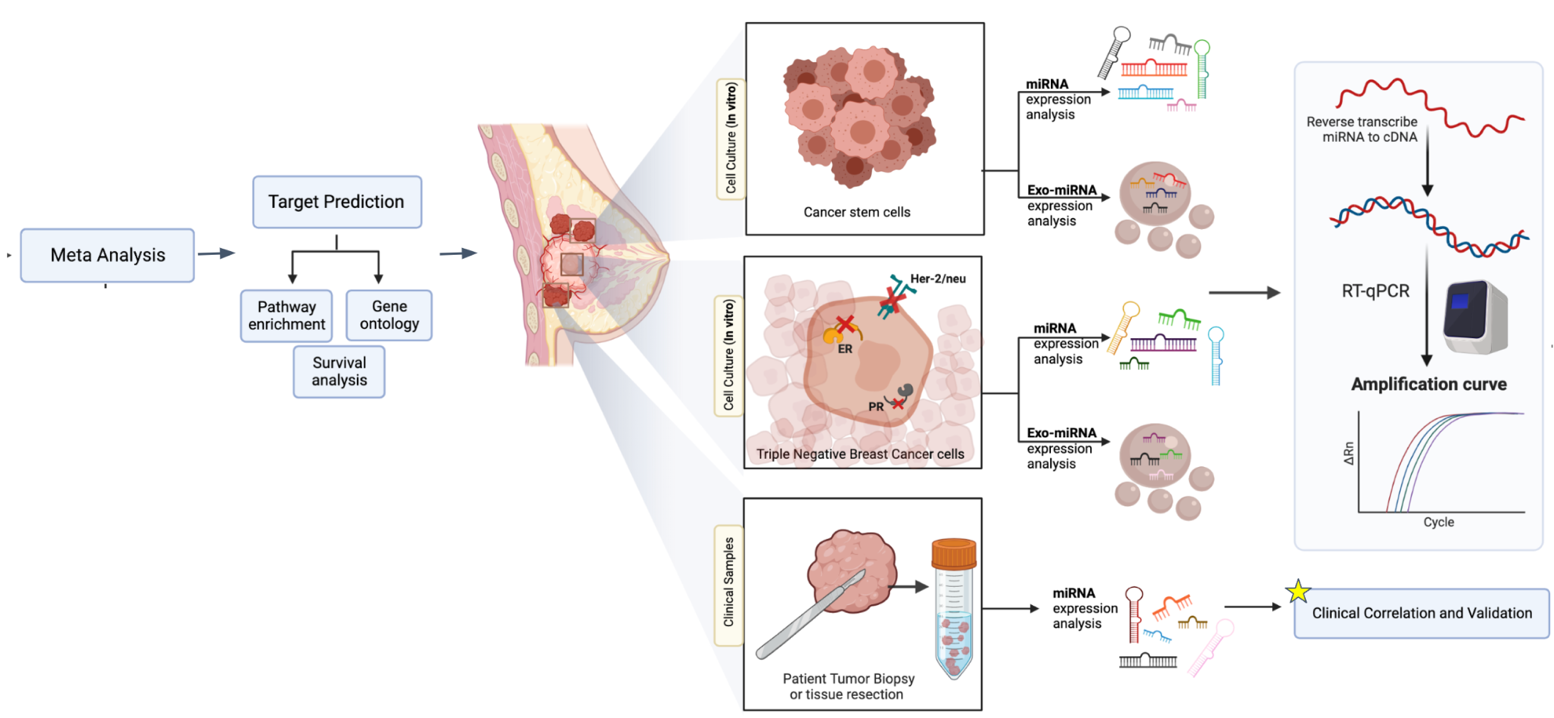


S1(Fig 1):  Study workflow and etiological model for analysis of exomiRs released by TNBC and TNBC stem cells; figure created with Biorender.com

**Figure 2**


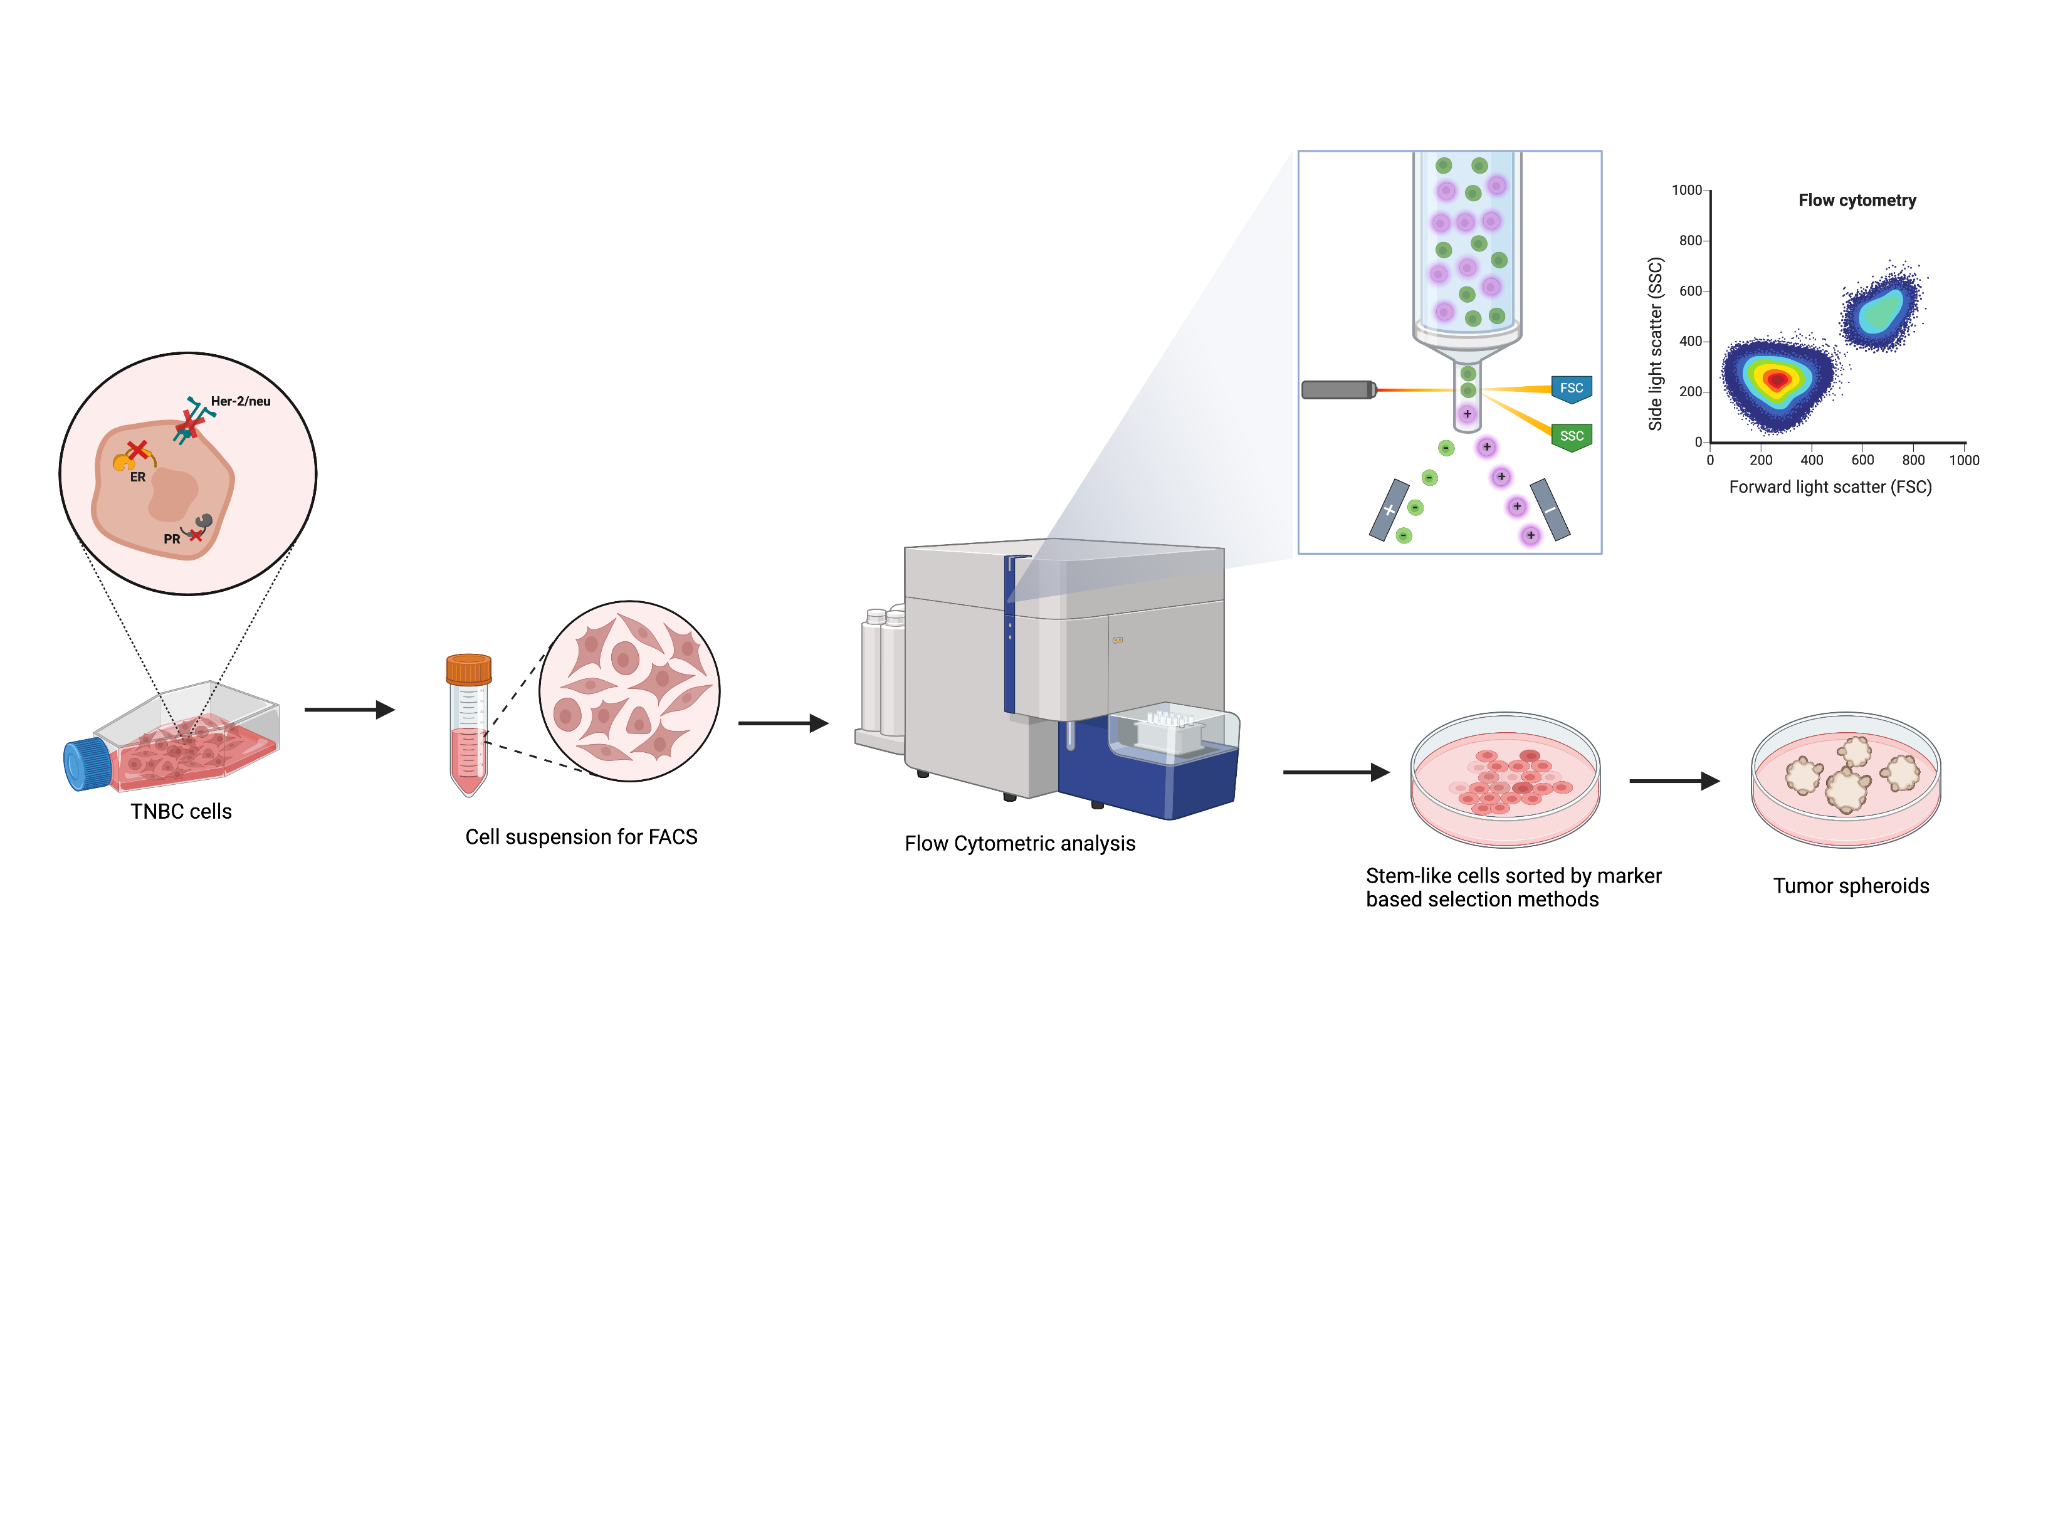


S1 (Fig 2) Representative model (workflow) depicting the isolation and characterization of TNBC derived stem-like cells. Cancer cell suspension is analysed by fluorescence activated cell sorting machines (FACS) by means of marker-based selection methods and dye-exclusion assays. Figure created with Biorender.com

**Western Blots**

**WB Full size images**

Full size blots for Fig 4 (d): Immunoblot showing expression of CD81 exosomal marker in TNBC cell line MDA-MB 231 derived exosome samples. Calnexin is used as a negative control while β-Actin is used as a positive control


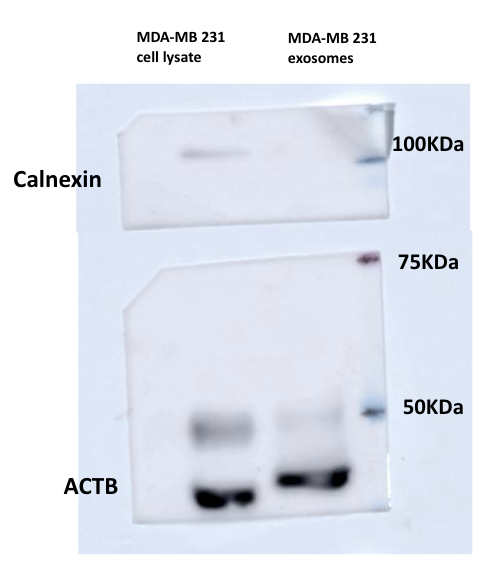

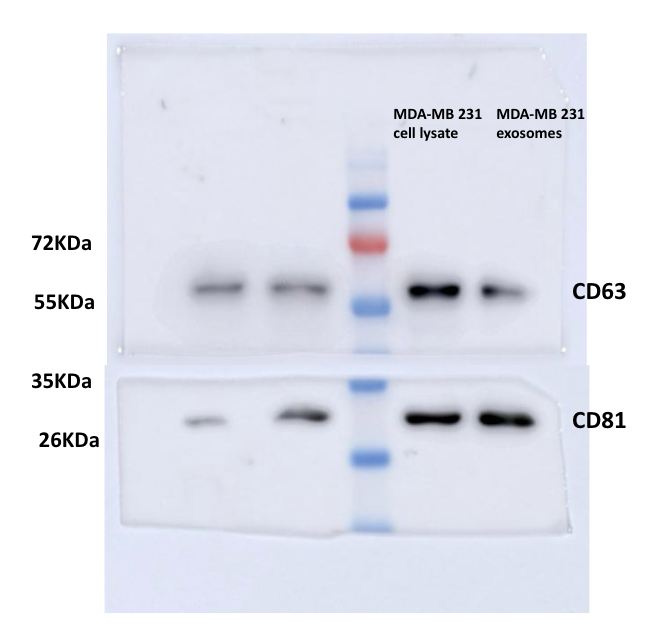


Full size blots for Fig 6 (H): Immunoblot showing expression levels of SOX2 in TNBC tumorspheres and cancer cells. GAPDH was used as positive control


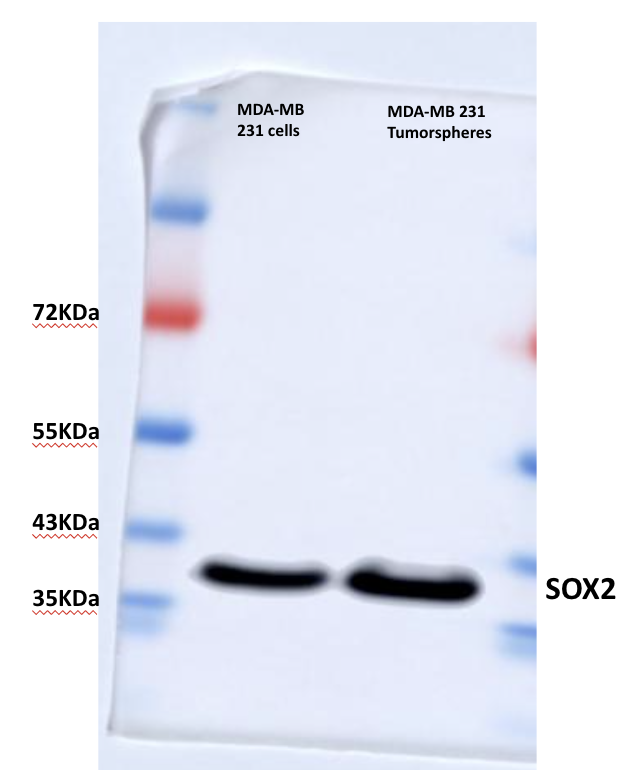
 **
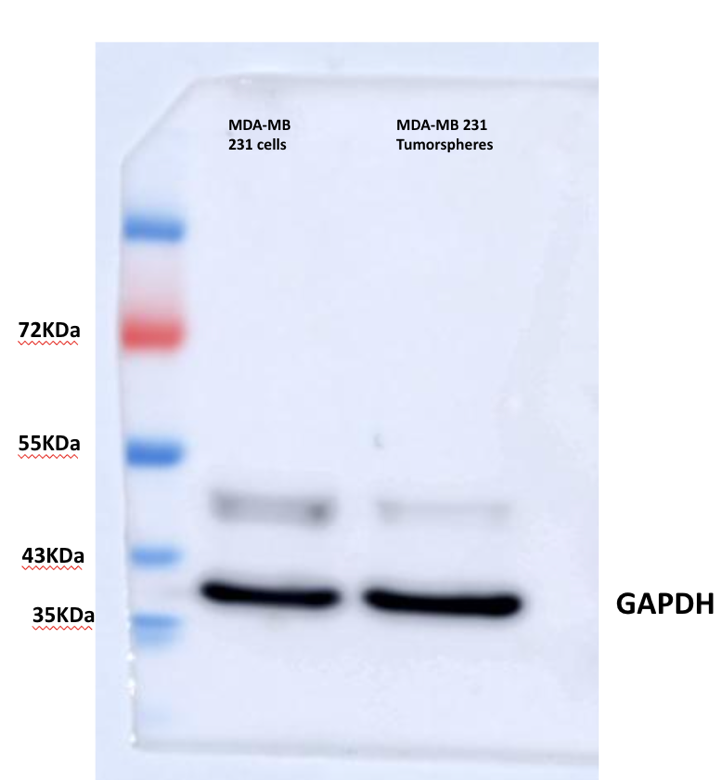
**

**Supplementary Table 1 (S1) : List of RT-qPCR primers used in the study**

| SNo. | Primers | Sequence |
| --- | --- | --- |
| 1 | **Sox2** | F: CGAGATAAACATGGCAATCAAATG  R: CACCAGAACAAATTCCGTTTGCAA |
| 2 | **ABCG2** | F: GCAGATGCCTTCTTCGTTATG  R: TCTTCGCCAGTACATGTTGC |
| 3 | **ALDH1** | F: GTCCTACTCACCGATTTGAA  R: CTTGTATAATAGTCGCCCCC |
| 4 | **miR 1915-3p**  (stem loop) | GTTGGCTCTGGTGCAGGGTCCGAGGTATTCGCACCAGAGCCAACCCCGCC |
| 5 | **miR 1180-3p** (stem loop) | GTTGGCTCTGGTGCAGGGTCCGAGGTATTCGCACCAGAGCCAACTATTCC |
| 6 | **miR 940**  (stem loop) | GTTGGCTCTGGTGCAGGGTCCGAGGTATTCGCACCAGAGCCAACACCACA |
| 7 | **miR 6803**  (stem loop) | GTTGGCTCTGGTGCAGGGTCCGAGGTATTCGCACCAGAGCCAACACGCCC |
| 8 | **miR 4728**  (stem loop) | GTTGGCTCTGGTGCAGGGTCCGAGGTATTCGCACCAGAGCCAACCTGGGG |
| 9 | **miR 1180-3p** (Forward) | TTTTTGGACCCACCCGGC |
| 10 | **miR 1915-3p**  (Forward) | TTTTTCCCCAGGGCGACG |
| 11 | **miR 940**  (Forward) | TTGTTAAGGCAGGGCCCC |
| 12 | **miR 6803**  (Forward) | TTTTTCTGGGGGTGGGGG |
| 13 | **miR 4728**  (Forward) | GTTTCATGCTGACCTCCCT |
| 14 | **Universal Reverse** | GTGCAGGGTCCGAGGT |
